# Supplementary material
Source: PubMed Central journal article supplement (PMC4084558)
Supplement: NIHMS590359-supplement-Supplementary_figures_and_Legends.pdf [file NIHMS590359-supplement-Supplementary_figures_and_Legends.pdf]

## Supplementary Information

Supplementary Figure S1

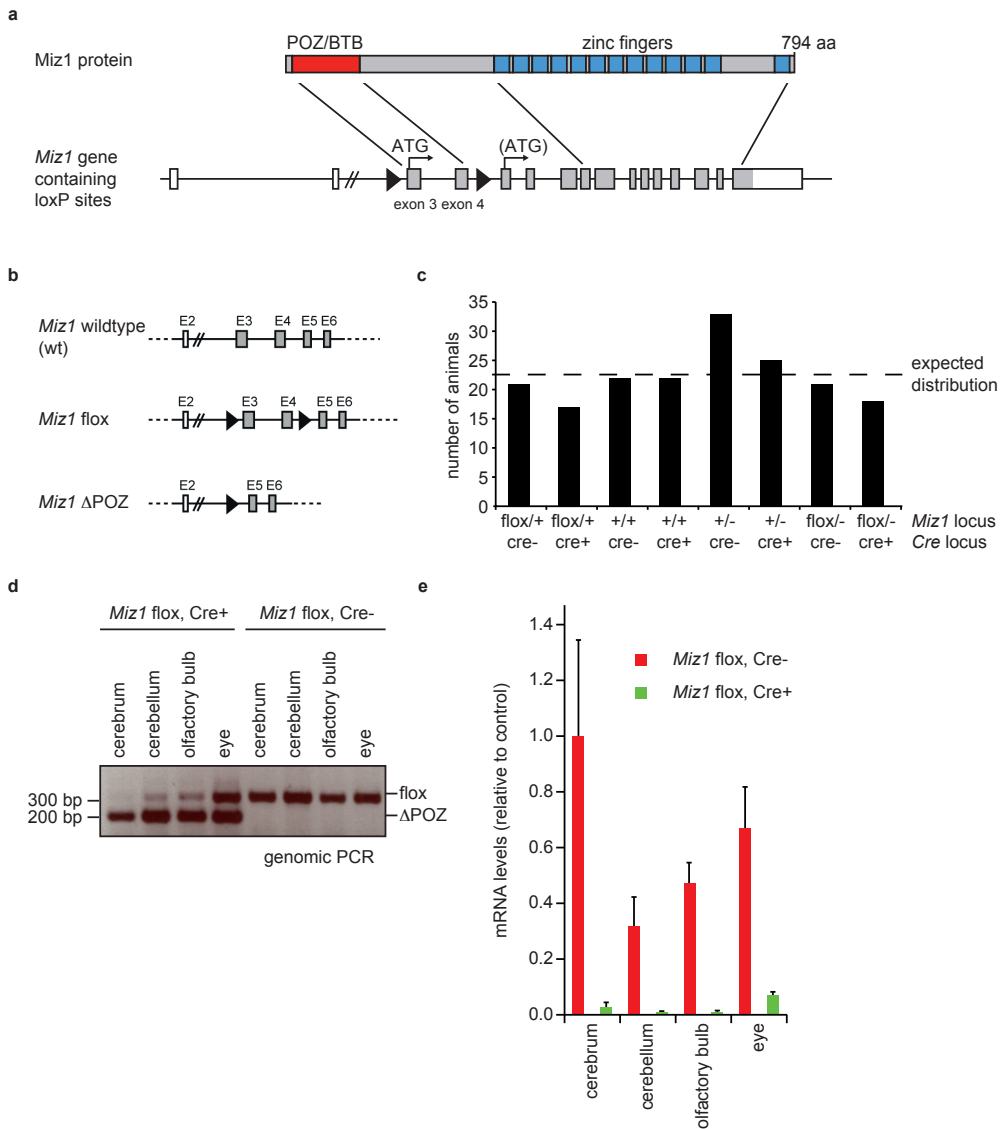

### Supplementary Figure S1: Generation and characterization of *Miz1* <sup>$\Delta$ POZ<sup>Nes</sup> mice.</sup>

(a, b) Scheme of the mouse models used. The amino-terminal POZ domain of Miz1 is encoded by exon 3 and exon 4, which are flanked by loxP sites (black triangles).

(c) *Miz1*<sup>wt/ $\Delta$ POZ</sup> and *Miz1*<sup>flox/wt<sup>Nes</sup></sup> mice were crossed and the number of offspring genotypes was analyzed (n = 179). The expected number of animals according to Mendelian laws is indicated.

(d, e) Expression of *Miz1* in different tissues from *Miz1*<sup>ΔPOZNes</sup> and control mice was tested by genomic PCR (d) and qRT-PCR (e). Primers are located within exons 3 and 4. The experiment was performed twice with identical results. Error bars are SD of three technical replicates.

**Supplementary Figure S2**

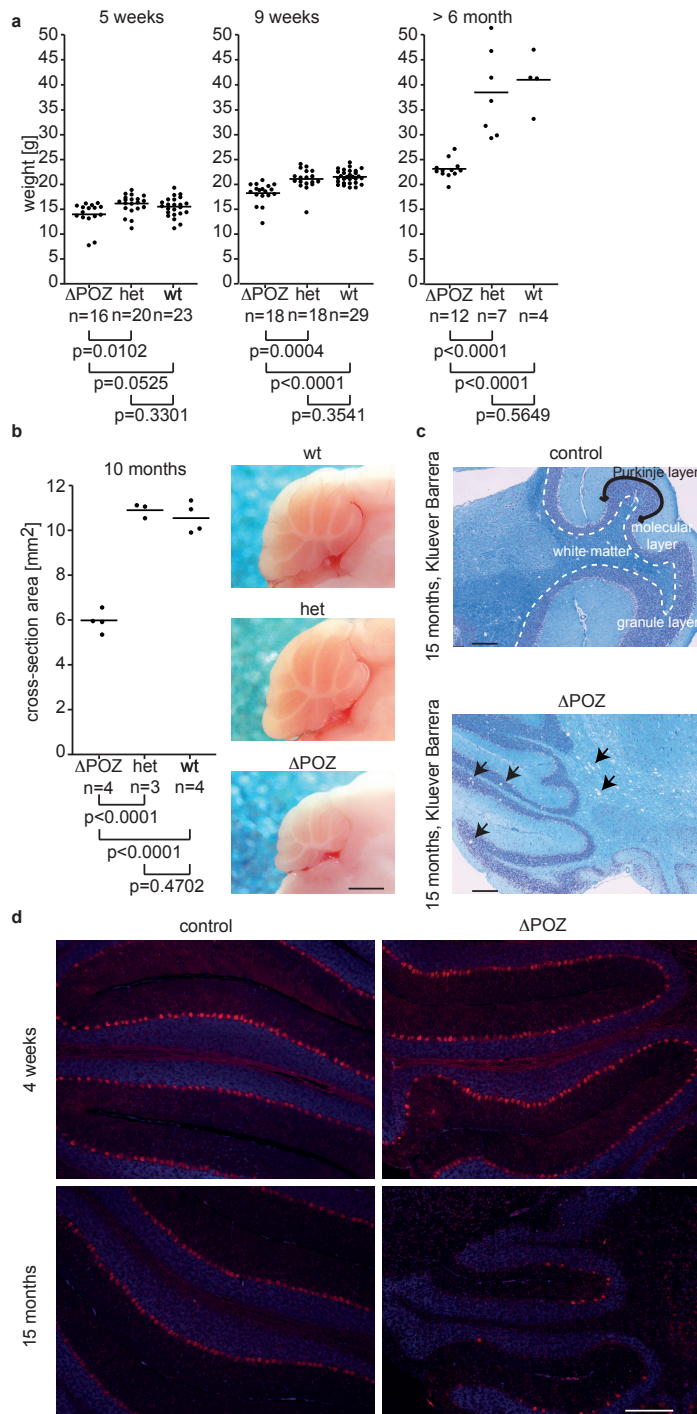

**Supplementary Figure S2: *Miz1* <sup>$\Delta$ POZNes</sup> mice develop a progressive neurodegenerative phenotype.**

(a) Weight of *Miz1* <sup>$\Delta$ POZNes</sup> mice and control mice at five and nine weeks as well as six months of age. All compared mice express the Nestin-Cre transgene. Data are shown for *Miz1* <sup>$\Delta$ POZNes</sup> (*Miz1* <sup>$\Delta$ POZ/flox</sup>Cre<sup>+</sup>, *Miz1*<sup>flox/flox</sup>Cre<sup>+</sup>), heterozygous (*Miz1*<sup>+/ $\Delta$ POZ</sup>Cre<sup>+</sup>, *Miz1*<sup>+/flox</sup>Cre<sup>+</sup>) and wild

type ( $Miz1^{+/+}Cre^+$ ) mice. p-values were calculated using a two-tailed, unpaired t-test. The number of animals tested is shown below each graph.

(b) Defect of cerebellar growth in  $Miz1^{\Delta POZNes}$  mice in comparison to wild type and heterozygous control mice. The panels show sagittal sections of brains at the age of 10 months. Scale bar: 1mm. Data are shown for  $Miz1^{\Delta POZNes}$  ( $Miz1^{\Delta POZ/flox}Cre^+$ ), heterozygous ( $Miz1^{+/flox}Cre^+$ ,  $Miz1^{flox/\Delta POZ}Cre^-$ ) and wild type ( $Miz1^{+/+}Cre^-$ ) mice. p-values were calculated using a two-tailed, unpaired t-test. The number of animals tested is shown below each graph.

(c) Klüver-Barrera staining of cerebella from  $Miz1^{\Delta POZNes}$  mice and control mice. Black arrows show perforations in the white matter and in the internal granular layer of  $Miz1^{\Delta POZNes}$  mice. Scale bar: 200  $\mu$ m.

(d) Immunofluorescence staining of Calbindin (Purkinje cells), nuclei are counterstained with DAPI. The age of mice is indicated. Scale bar: 200  $\mu$ m.



Supplementary Figure S3

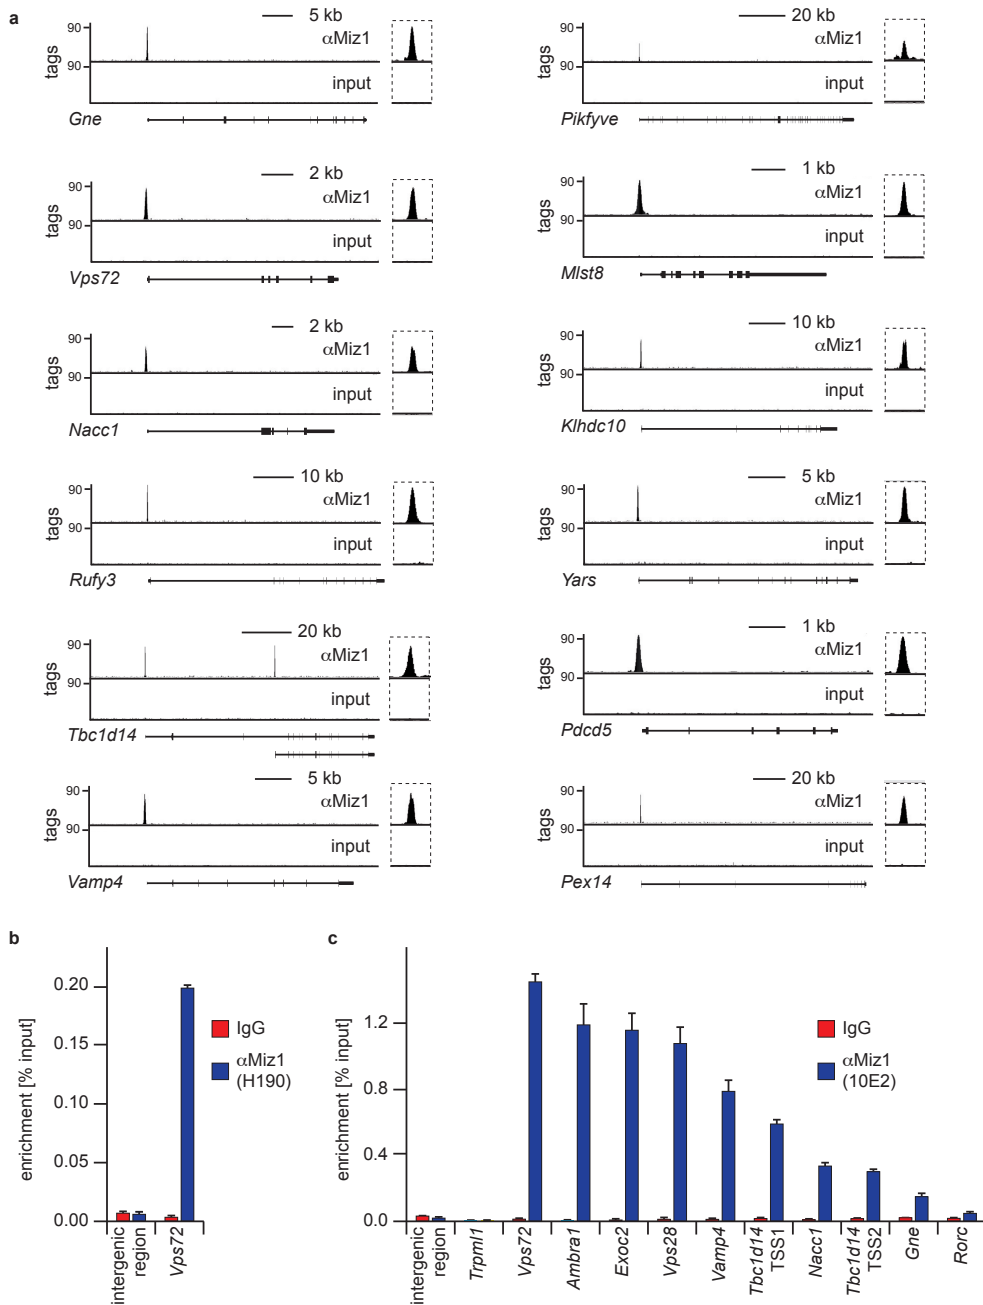

Supplementary Figure S3: Additional ChIP-Sequencing data.

(a) Additional examples of ChIP sequencing data obtained for Miz1. Input traces are shown as negative control. For each gene, the intron/exon structure is shown below the traces with

exons indicated as vertical bars and the transcriptional start site at the left. An enlarged picture of the peak region is shown on the right.

(b,c) Validation of the ChIP-sequencing results. Shown are data obtained with the antibody H190 (b, used in the ChIP-sequencing experiment) and 10E2 (c, a monoclonal  $\alpha$ -Miz1 antibody). The immunoprecipitated material was analyzed by quantitative PCR at transcriptional start sites, which were positive for Miz1 binding in the ChIP-Sequencing experiment. An intergenic region and the transcriptional start site of *Trpm11* were used as negative controls. Error bars depict SD from three technical replicates.



Supplementary Figure S5

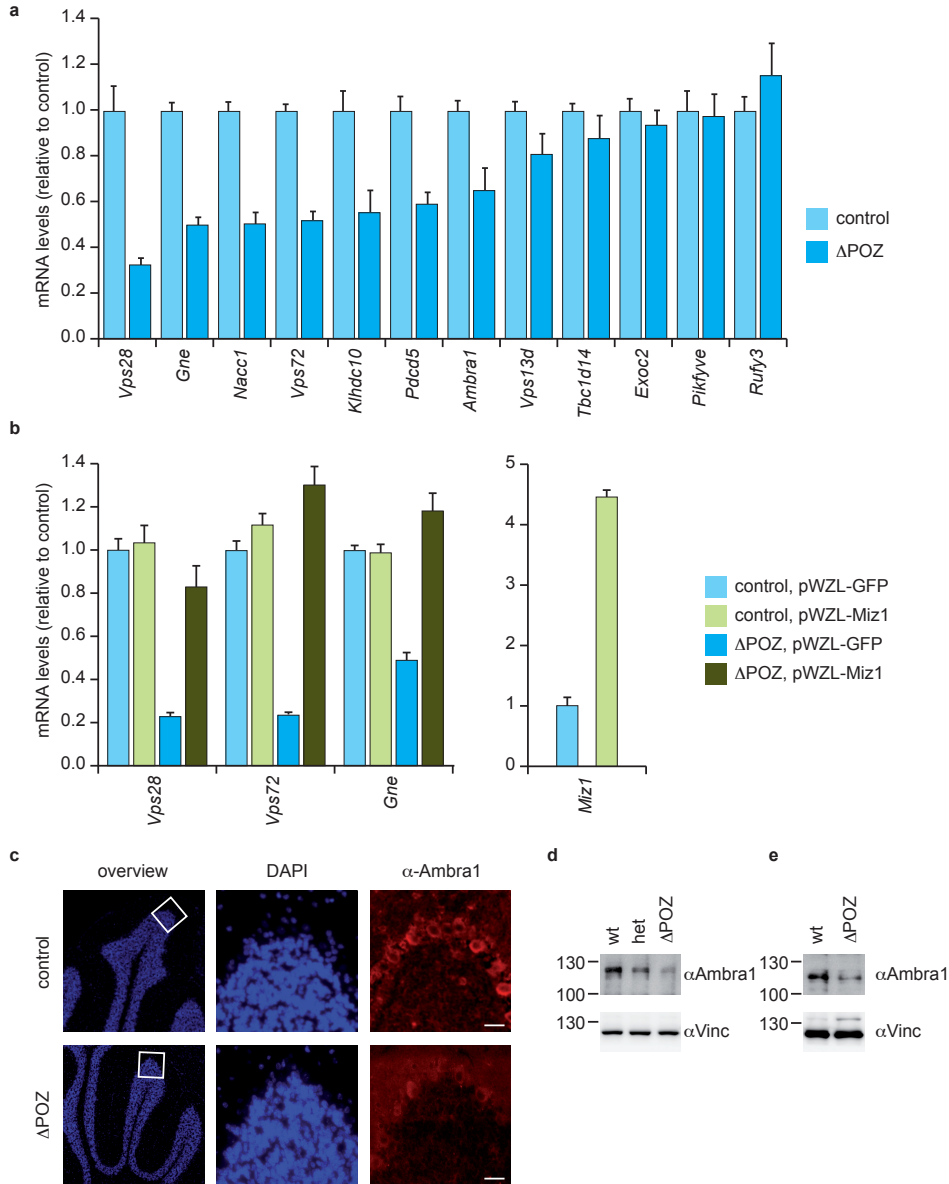

**Supplementary Figure S5: Regulation of Miz1 target genes.**

(a) qRT-PCR assays documented reduced expression of direct Miz1 target genes in *Miz1*<sup>ΔPOZ</sup> mouse embryonic fibroblasts (MEFs) in comparison to control MEFs. Error bars (SD) result from technical triplicates.

(b) Reduced expression of Miz1 target genes in *Miz1*<sup>ΔPOZ</sup> cells is rescued by expression of full-length Miz1. Mouse embryonic fibroblasts of the indicated genotypes were infected with retroviruses encoding full-length Miz1 or an empty vector control. The expression level of Miz1 target genes was measured by qRT-PCR. Error bars (SD) result from technical triplicates.

(c) Immunohistochemistry documenting expression of Ambra1 in cerebella of wild-type and *Miz1*<sup>ΔPOZNes</sup> mice at four weeks of age. Scale bar: 25 μm.

(d,e) Immunoblots of Ambra1 expression in (d) brains from *Miz1*<sup>ΔPOZNes</sup>, heterozygous and wild type mice and (e) in wild type and *Miz1*<sup>ΔPOZ</sup> fibroblasts. Expression of α-vinculin was used as loading control.

### Supplementary Figure S6

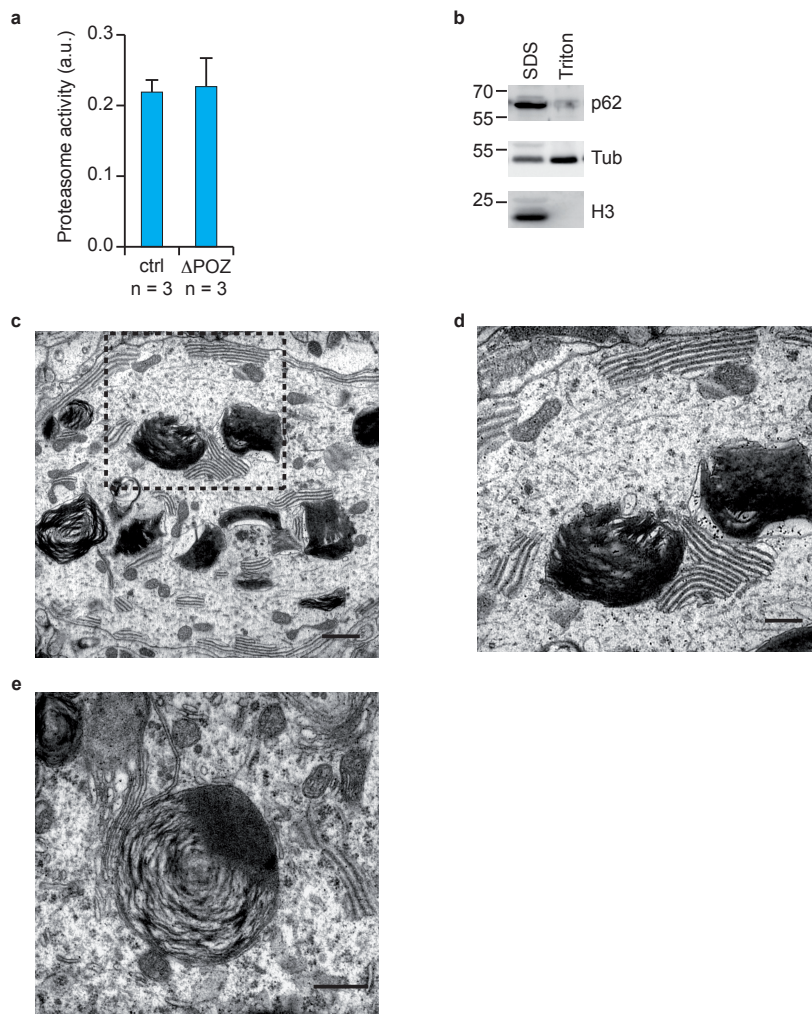

### Supplementary Figure S6: Biochemical and ultrastructural analysis of *Miz1* <sup>$\Delta$ POZNes</sup> mice.

(a) Proteasomal activity in cerebella of *Miz1* <sup>$\Delta$ POZNes</sup> and control mice. Error bars represent SEM derived from the indicated numbers of animals.

(b) p62 accumulates in an insoluble manner in *Miz1* <sup>$\Delta$ POZNes</sup> cerebella. Immunoblotting of p62 after sequential extraction of cerebellar proteins with TritonX-100 and SDS.  $\alpha$ -tubulin and histone H3 were used as soluble/insoluble marker proteins.

(c-e) Transmission electron microscopic analysis of cerebella from aged *Miz1* <sup>$\Delta$ POZNes</sup> mice. In the cytoplasm of Purkinje cells multilamellar bodies are found in close apposition (c,d: enlargement) and occasionally in contact (e) with cisterns of the endoplasmic reticulum. Scale bars: (c): 1000 nm, (d,e): 500nm.

### Supplementary Figure S7

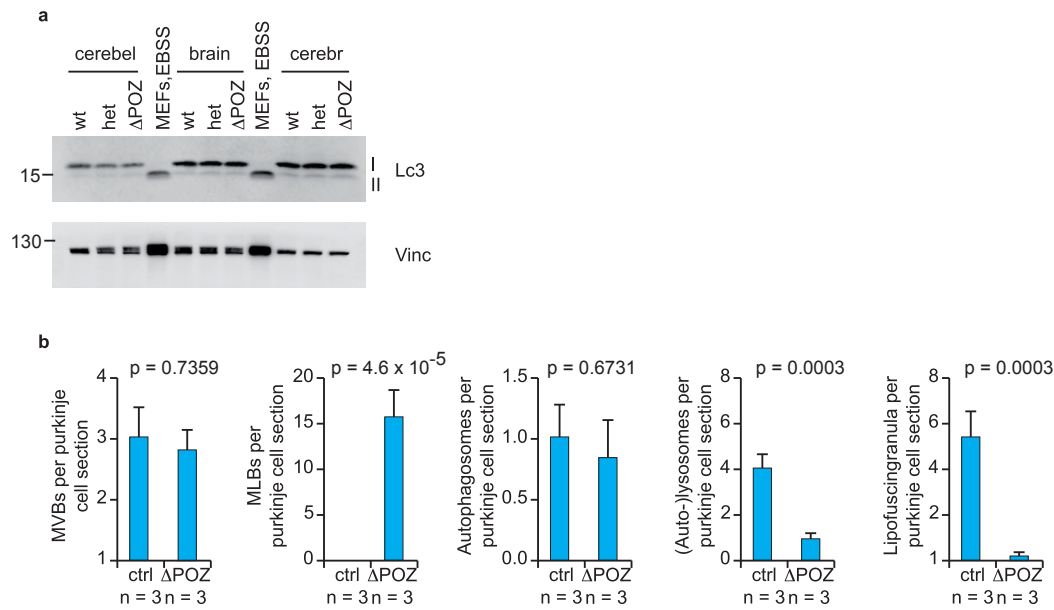

### Supplementary Figure S7: Analysis of autophagy defects in cerebella from *Miz1*<sup>ΔPOZ<sup>Nes</sup></sup> mice.

(a) Immunoblots documenting levels of unconjugated Lc3 and Lc3 conjugated to phosphatidylethanolamin (Lc3-II) in cerebella, total brain and cerebra of wild type, *Miz1*<sup>ΔPOZ<sup>Nes</sup></sup> and heterozygous mice. As a positive control for conjugated Lc3, lysates from mouse embryo fibroblasts starved for amino acids ("MEFs, EBSS") were included as indicated.

(b) Quantification of different organelles in Purkinje cells of wild type and *Miz1*<sup>ΔPOZ<sup>Nes</sup></sup> mice. The diagrams show the number of organelles found per section of an entire neuron. For each diagram, organelles in a minimum of 15 cells ( $n \geq 5$  from 3 animals each) were counted. p-values were calculated using a two-tailed, unpaired t-test. Error bars show SEM. MVB-multivesicular bodies; MLB-multilamellar bodies.

**Supplementary Figure S8**

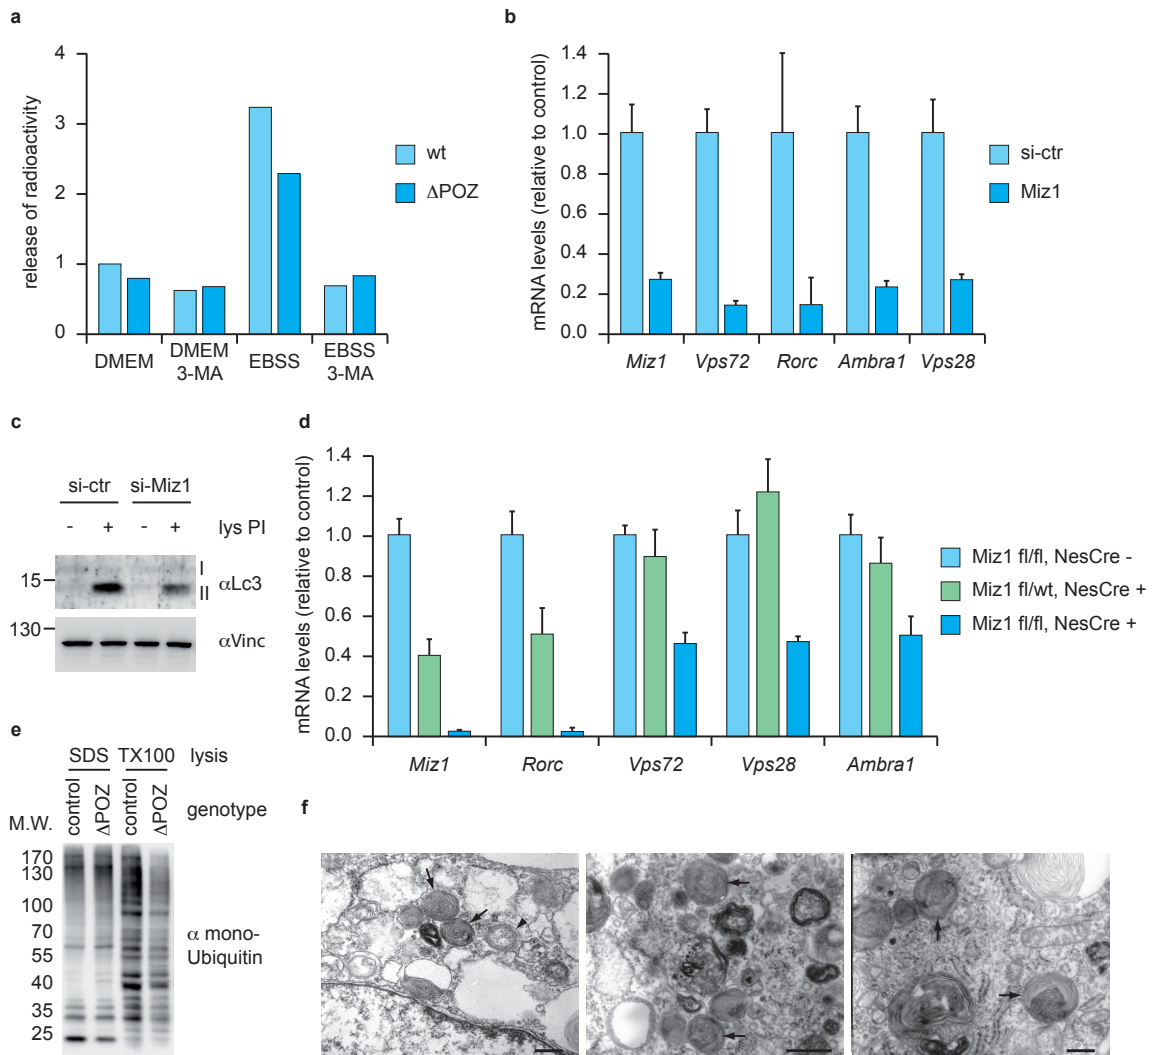

**Supplementary Figure S8: Further characterization of Miz1<sup>ΔPOZ</sup> cells and neurospheres.**

(a) Long-lived protein degradation assay in wild type and Miz1<sup>ΔPOZ</sup> mouse embryo fibroblasts. Where indicated, 3-methyladenin (3-MA) was added to inhibit autophagy. Values represent the average of two independent experiments with identical results.

(b) Acute depletion of Miz1 reduces expression of direct target genes. The graph shows the results of qRT-PCR assays analyzing expression of the indicated genes in mouse embryo fibroblasts transfected with siRNA targeting *Miz1* or control siRNA and harvested three days after transfection. Error bars depict SD of technical triplicates.



(c) Immunoblots using a  $\alpha$ -Lc3 antibody detecting Lc3-I and conjugated Lc3-II. Mouse embryo fibroblasts were transfected with siRNA targeting *Miz1* or control siRNA as above. Where indicated, they were incubated with leupeptin and ammonium chloride (lys PI) for two hours in DMEM. The expression of  $\alpha$ -vinculin (lower panels) was used as loading control.

(d) qRT-PCR assays documenting expression of *Miz1* and the indicated target genes of *Miz1* in neurospheres isolated from mice of the indicated genotypes. Error bars depict SD of technical triplicates.

(e) Immunoblot of Triton X-100 soluble (“TX100”) and insoluble (“SDS”) fractions of lysates of cultured neuronal progenitor cells (NPCs) obtained from control and *Miz1* <sup>$\Delta$ POZ</sup> mice. The blot was probed with an antibody recognizing mono-ubiquitinated proteins.

(f) Electron microscopy showing accumulation of multilamellar bodies (arrows; arrowhead: multivesicular body) in a subset of cells in *Miz1* <sup>$\Delta$ POZ</sup> neurospheres. Some of these cells display large vacuoles, indicative of early stages of apoptosis. Scale bar: 0.5 $\mu$ m.

Supplementary Figure S9

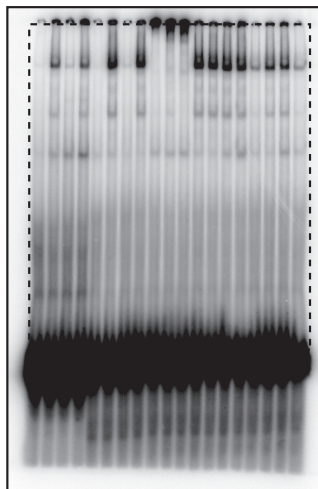

Figure 3 e

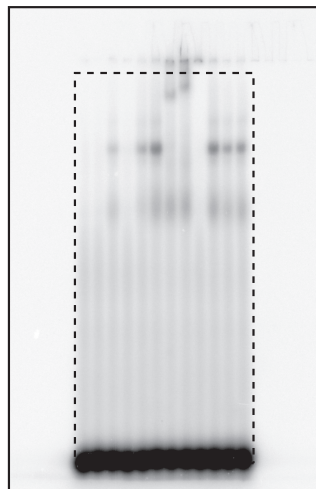

Figure S4

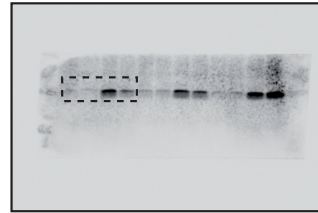

Figure 6 c-5

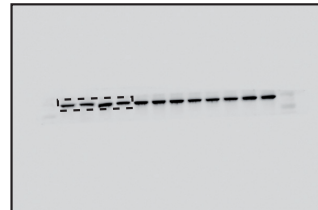

Figure 6 c-6

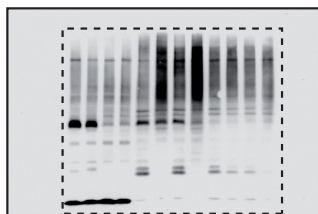

Figure 5 e-1

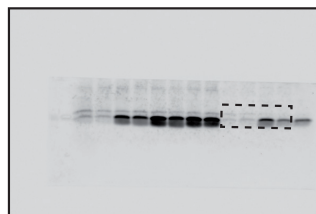

Figure 6 c-1

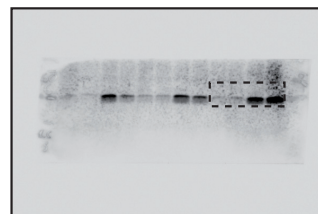

Figure 6 c-7

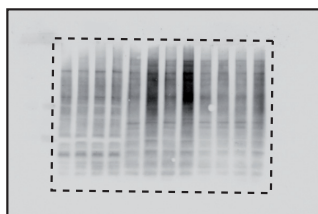

Figure 5 e-2

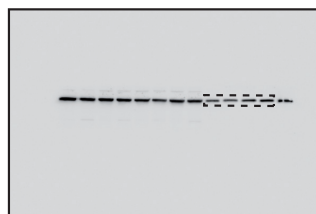

Figure 6 c-2

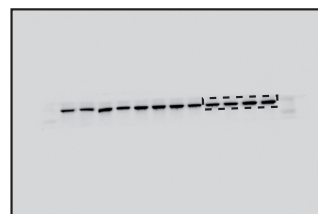

Figure 6 c-8

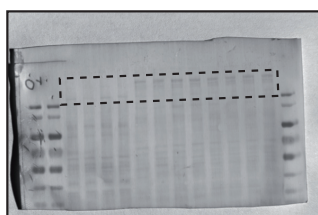

Figure 5 e-3

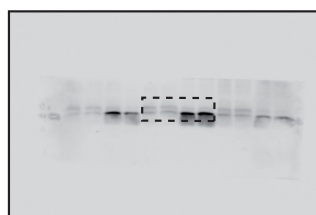

Figure 6 c-3

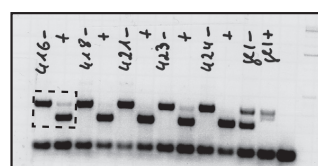

Figure 6 f

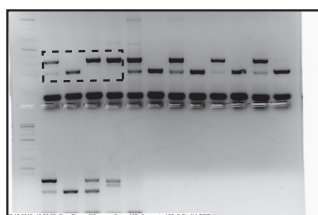

Figure 6 a

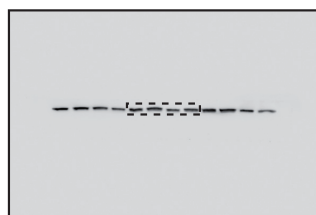

Figure 6 c-4

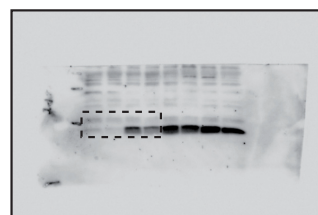

Figure 6 g-1

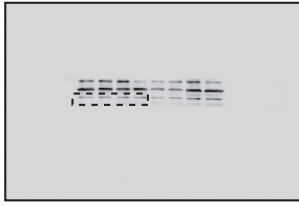

Figure 6 g-2

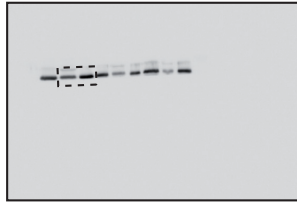

Figure S6 b-2

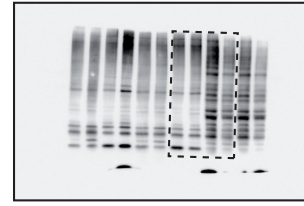

Figure S8 e

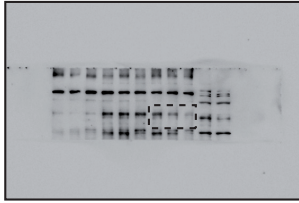

Figure S5 d-1

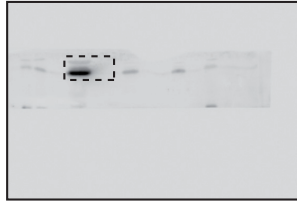

Figure S6 b-3

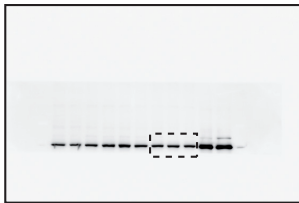

Figure S5 d-2

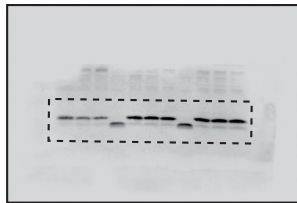

Figure S7 a-1

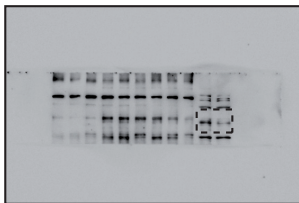

Figure S5 e-1

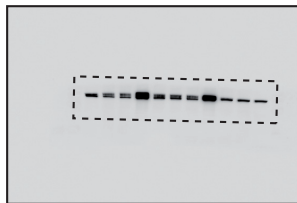

Figure S7 a-2

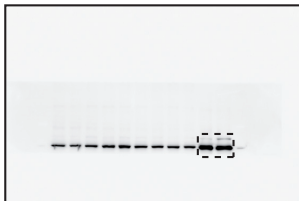

Figure S5 e-2

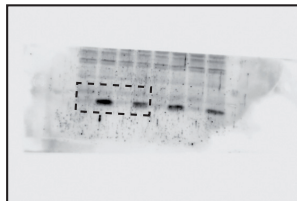

Figure S8 c-1

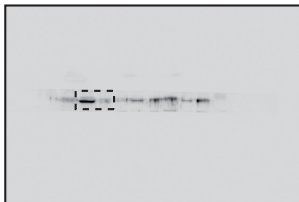

Figure S6 b-1

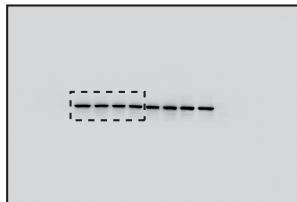

Figure S8 c-2

**Supplementary Figure S9: Uncropped Images of all immunoblots.**

**Supplementary Table S1**

| alignment            |            |            |            |            |
|----------------------|------------|------------|------------|------------|
| dataset              | Input-NPC  | Miz-NPC    | input-MDA  | Miz-MDA    |
| high quality reads   | 35,940,222 | 36,008,514 | 12,681,385 | 15,837,713 |
| aligned to           | mm9        | mm9        | hg19       | hg19       |
| bowtie version       | 0.12.8     | 0.12.8     | 0.12.8     | 0.12.8     |
| non-standard options | -m 1, -v 0 | -m 1, -v 0 |            |            |
| aligned reads        | 27,282,985 | 26,383,298 | 12,070,466 | 14,321,677 |

| peak annotation                          |            |            |
|------------------------------------------|------------|------------|
| dataset                                  | Miz-NPC    | Miz-MDA    |
| MACS-Version                             | 1.4.2      | 1.4.2      |
| treat                                    | Miz-NPC    | Miz-MDA    |
| control                                  | input-NPC  | input-MDA  |
| p-value                                  | $10^{-10}$ | $10^{-10}$ |
| number of total peaks                    | 261        | 2911       |
| peaks in promoters (+/-1.5kb)            | 140        | 830        |
| peaks in promoters after liftover to mm9 | 140        | 776        |

**Supplementary Table S1: Parameter of next generation sequencing experiments.**

The table lists the parameters of the individual sequencing experiments as well the parameters used for peak annotation.

**Supplementary Table S2**

| gene symbol | tags | distance to next TSS |
|-------------|------|----------------------|
| Abtb2       | 24   | 29110                |
| Aff1        | 29   | -481                 |
| Agxt2l2     | 20   | -30032               |
| Aip         | 183  | 3                    |
| Akap8l      | 284  | -13941               |
| Alox8       | 107  | -13801               |
| Ambra1      | 434  | -21                  |
| Ank3        | 42   | -143896              |
| Arsk        | 246  | -79                  |
| Atf6b       | 20   | -150                 |
| Axin2       | 289  | 91556                |
| Bahcc1      | 36   | 31436                |
| Bcat1       | 33   | 17467                |
| Bend5       | 104  | -105                 |
| Bin1        | 17   | -10523               |
| C2cd5       | 297  | -128                 |
| Cacna2d1    | 16   | 55194                |
| Ccdc12      | 23   | -210                 |
| Ccrn4l      | 111  | -44788               |
| Cct8        | 251  | -124                 |
| Cdk8        | 178  | 29500                |
| Cdk8        | 99   | 29361                |
| Cdkl4       | 132  | 10447                |
| Cenpe       | 46   | -56996               |
| Cep70       | 61   | -56                  |
| Chd5        | 27   | 13310                |
| Chsy3       | 17   | 148416               |
| Clcc1       | 140  | -3                   |
| Cmklr1      | 92   | 72815                |
| Coa6        | 49   | -42242               |
| Cox19       | 331  | -35                  |
| Cpped1      | 79   | -69                  |
| Crybb3      | 29   | -3920                |
| Cstf1       | 376  | -79                  |
| Ctgf        | 39   | -10093               |
| Cul2        | 31   | -277                 |
| Dapp1       | 35   | 11403                |
| Dcaf5       | 80   | 1396                 |
| Dclre1b     | 108  | -20                  |
| Dcp1b       | 174  | -80                  |
| Dctn6       | 299  | 5                    |
| Ddx18       | 78   | -789                 |
| Dlg2        | 27   | -390012              |
| Dph1        | 269  | -25                  |

|               |     |        |
|---------------|-----|--------|
| Dusp4         | 35  | 7045   |
| Dync2h1       | 120 | -51    |
| Dynlrb1       | 70  | -311   |
| E130006D01Rik | 52  | -509   |
| E130006D01Rik | 26  | 828    |
| E130307A14Rik | 94  | 93     |
| E2f7          | 152 | 58905  |
| Eif2b3        | 292 | -59    |
| Entpd7        | 93  | 8178   |
| Ercc2         | 332 | -183   |
| Erg           | 16  | 85669  |
| Exoc2         | 325 | -47    |
| Fan1          | 407 | -24    |
| Fance         | 43  | -128   |
| Fbrsl1        | 65  | -83    |
| Fbxl15        | 84  | 189    |
| Fbxl16        | 45  | -5702  |
| Fbxw5         | 95  | 25     |
| Fgfr1op       | 50  | 11872  |
| Figl2         | 26  | 5864   |
| Filip1l       | 349 | 38358  |
| Fkbpl         | 143 | -177   |
| Gbe1          | 44  | 185    |
| Gins3         | 209 | -80    |
| Gm12669       | 97  | -35    |
| Gm1821        | 24  | -22772 |
| Gm4559        | 87  | -10448 |
| Gm5464        | 23  | 10666  |
| Gm6498        | 48  | 59213  |
| Gm8579        | 217 | -87017 |
| Gm9054        | 27  | 1033   |
| Gne           | 306 | -39    |
| Gphn          | 49  | -531   |
| Gtdc2         | 30  | 20508  |
| Gtpbp8        | 68  | -39    |
| Hdac9         | 37  | 32815  |
| Hdgf          | 294 | -59    |
| Heatr5a       | 310 | -97    |
| Hipk1         | 80  | -39    |
| Hipk2         | 90  | -134   |
| Hk1           | 45  | 19530  |
| Hmgxb4        | 219 | -49    |
| Id1           | 88  | 5639   |
| Idh1          | 102 | -80    |
| Ier5          | 42  | 116610 |
| Ikzf2         | 84  | -1278  |

|             |     |         |
|-------------|-----|---------|
| Ikzf2       | 46  | -1580   |
| Impa2       | 18  | 6126    |
| Ino80       | 248 | -69     |
| Kdm8        | 386 | 36      |
| Kdr         | 34  | 53766   |
| Kif26a      | 137 | 25666   |
| Klhdc10     | 339 | -178    |
| Klh5        | 16  | -51228  |
| Kras        | 112 | -74     |
| Lactb       | 122 | -41     |
| Limd1       | 140 | -16713  |
| Lrp12       | 263 | -363    |
| Lrtm1       | 31  | 11000   |
| Lsm5        | 284 | -81     |
| Mettl25     | 287 | -34     |
| Mfsd6l      | 228 | -19559  |
| Mir146      | 20  | 103889  |
| Mir297-1    | 23  | -84965  |
| Mir702      | 62  | 9428    |
| Mlst8       | 330 | 1       |
| Mmadhc      | 270 | -73     |
| Mn1         | 50  | 58234   |
| Mrps15      | 305 | 39      |
| Mrps23      | 316 | -99     |
| Msi1        | 27  | -14469  |
| Myom2       | 16  | 462281  |
| Nacc1       | 198 | -69     |
| Ncam1       | 19  | 17465   |
| Ncor2       | 43  | 58459   |
| Ndufa5      | 228 | 65      |
| Ngb         | 23  | 25680   |
| Nrip1       | 35  | 22      |
| Ogfod3      | 194 | -38     |
| Olfr1274-ps | 80  | -5480   |
| Otud4       | 112 | -117441 |
| Palb2       | 388 | -51     |
| Parp1       | 42  | -37     |
| Pcbp1       | 20  | 9847    |
| Pcdhgc5     | 58  | 57718   |
| Pcnxl3      | 233 | -167    |
| Pdcd5       | 367 | -70     |
| Pde8b       | 26  | 21573   |
| Pet117      | 245 | -58     |
| Pex1        | 254 | 133     |
| Pex13       | 376 | 11      |
| Pex14       | 267 | -55     |

|         |      |         |
|---------|------|---------|
| Pex16   | 238  | -36     |
| Pex2    | 265  | -284475 |
| Pgd     | 116  | -121    |
| Pip5k1a | 39   | -63     |
| Pla2g15 | 106  | -160    |
| Pnma1   | 30   | -13552  |
| Poc1b   | 185  | -344    |
| Podn    | 250  | -39337  |
| Polr1c  | 25   | 953     |
| Pomt1   | 304  | -62     |
| Pou4f1  | 18   | 131008  |
| Ppap2b  | 36   | 62339   |
| Prdm4   | 184  | -259    |
| Proc    | 38   | 20419   |
| Psd3    | 78   | -45820  |
| Psd3    | 70   | -39981  |
| Psma1   | 329  | 2       |
| Psm3    | 370  | -18     |
| Psmg4   | 36   | 29      |
| Ptcd1   | 277  | -40     |
| Ptpra   | 29   | 45852   |
| Ptprm   | 22   | -126208 |
| Pts     | 34   | -5336   |
| Rad54l  | 109  | -48     |
| Raf1    | 267  | 69      |
| Ranbp9  | 64   | -593    |
| Rasal2  | 238  | -55     |
| Rbm34   | 36   | -8071   |
| Rhbdd1  | 21   | 20067   |
| Rif1    | 29   | -81     |
| Rmi2    | 17   | 33891   |
| Rmnd5b  | 39   | 40      |
| Rn45s   | 9148 | 2168    |
| Rn45s   | 4096 | 4775    |
| Rn45s   | 642  | 3610    |
| Rn45s   | 398  | 4228    |
| Rn45s   | 157  | 4061    |
| Rn45s   | 142  | 3906    |
| Rnf8    | 64   | 32      |
| Rorc    | 52   | -870    |
| Rpl22   | 462  | 18      |
| Rpl9    | 221  | -54     |
| Rps4y2  | 45   | 4016    |
| Rsrc1   | 295  | -17     |
| Rufy3   | 305  | -199    |
| Rwdd1   | 263  | -188    |



|              |     |         |
|--------------|-----|---------|
| Sec16a       | 96  | -679    |
| Sec61g       | 27  | -26530  |
| Serpina4-ps1 | 140 | -10291  |
| Sfswap       | 19  | -111540 |
| Slit1        | 48  | 91684   |
| Snord52      | 17  | 9562    |
| Snrpa1       | 350 | 161     |
| Snrpb2       | 259 | -63     |
| Snx18        | 333 | -81     |
| Soga2        | 28  | 86770   |
| Sorcs1       | 19  | 293088  |
| Sos1         | 202 | -2663   |
| Sos1         | 40  | 8809    |
| Stxbp6       | 36  | -363048 |
| Suox         | 31  | 4491    |
| Surf6        | 117 | -220    |
| Synj2        | 70  | 46141   |
| Synj2        | 47  | 46002   |
| Taf3         | 287 | -29     |
| Taf5l        | 109 | -122    |
| Taok3        | 386 | -111    |
| Tbc1d14      | 240 | 48      |
| Tbc1d14      | 180 | -45     |
| Tbcb         | 81  | 12554   |
| Tcea1        | 268 | 58      |
| Tex2         | 248 | -205    |
| Tfdp2        | 77  | -24     |
| Thsd4        | 34  | 59054   |
| Tiam2        | 19  | -52602  |
| Tmbim4       | 371 | -84     |
| Tmem167b     | 314 | 3       |
| Tmem25       | 30  | -57     |
| Tpk1         | 118 | -27     |
| Tram111      | 26  | -49     |
| Trim27       | 44  | -81     |
| Tshz1        | 82  | 93      |
| Tshz1        | 40  | 128087  |
| Tshz2        | 45  | -903    |
| Tshz3        | 87  | -1486   |
| Tspan5       | 42  | 147199  |
| Tsr2         | 137 | -38     |
| Ttc23        | 63  | 7958    |
| Tug1         | 64  | -38     |
| Txndc11      | 119 | -9588   |
| U2surp       | 262 | 60      |
| Ube3c        | 36  | -84     |

|               |     |        |
|---------------|-----|--------|
| Uqcc          | 44  | 1169   |
| Vamp4         | 429 | -296   |
| Vav2          | 273 | -15636 |
| Vps13d        | 343 | -43    |
| Vps28         | 370 | -101   |
| Vps72         | 302 | -34    |
| Vti1a         | 68  | 170344 |
| Vwf           | 43  | 32801  |
| Wdr12         | 147 | 181    |
| Wdr13         | 20  | 7      |
| Yars          | 378 | 78     |
| Yipf6         | 180 | -331   |
| Ypel2         | 22  | 72931  |
| Zadh2         | 18  | -533   |
| Zdhhc15       | 23  | 203    |
| Zdhhc21       | 34  | 169279 |
| Zfp362        | 255 | -5410  |
| Zfp644        | 23  | -68701 |
| Zfyve20       | 233 | -95    |
| Zmiz2         | 55  | -79    |
| Znhit3        | 397 | -98    |
| 1700001O22Rik | 42  | 2029   |
| 1700018B08Rik | 22  | 105022 |
| 1700034G24Rik | 96  | -71403 |
| 1810010D01Rik | 40  | 95777  |
| 1810010D01Rik | 27  | 67182  |
| 2900057B20Rik | 33  | 7864   |
| 4930404N11Rik | 29  | 3291   |
| 4930538K18Rik | 22  | -5605  |
| 4930546C10Rik | 132 | 259396 |
| 6820431F20Rik | 18  | 17647  |
| 9330133O14Rik | 94  | 1009   |
| 9430038I01Rik | 91  | -76    |

**Supplementary Table S2: List of Miz1 binding sites on chromatin in murine neurospheres.**

The table lists the 261 peaks identified in the ChIP-Sequencing experiments, the number of tags found for each peak, the closest gene and the distance to the transcription start site.

**Supplementary Table S3**

| gene symbol    | description                                                         | direct Miz1 target gene | array sec. spheres control/ $\Delta$ POZ [logFC] | array quart. spheres control/ $\Delta$ POZ [logFC] | array young cer. control/ $\Delta$ POZ [logFC] | array old cer. control/ $\Delta$ POZ [logFC] | documented role in vesicular transport                                                            | reference | documented role in autophagy                                                                                      | reference |
|----------------|---------------------------------------------------------------------|-------------------------|--------------------------------------------------|----------------------------------------------------|------------------------------------------------|----------------------------------------------|---------------------------------------------------------------------------------------------------|-----------|-------------------------------------------------------------------------------------------------------------------|-----------|
| <i>Rorc</i>    | RAR-related orphan receptor gamma                                   | +                       | -3.98                                            | -3.14                                              | -2.58                                          | -2.70                                        | plays a role in lysosomal processing                                                              | [52]      | knock down leads to accumulation of autophagosomes caused by impaired lysosomal processing.                       | [52]      |
| <i>Gne</i>     | glucosamine (UDP-N-acetyl)-2-epimerase/N-acetylmannosamine kinase   | +                       | -1.03                                            | -0.66                                              | -2.09                                          | -1.70                                        |                                                                                                   |           | "rimmed vacuoles", which are caused by mutation or knockdown are clusters of autophagic vacuoles                  | [62]      |
| <i>Tpm1</i>    | mucopolin 1                                                         |                         | -0.86                                            | 0.79                                               | -0.11                                          | -1.34                                        | lysosomal transmembrane protein, which functions in the late endocytic pathway                    | [53]      | required for neuronal macroautophagy                                                                              | [28]      |
| <i>Vps72</i>   | vacuolar protein sorting 72                                         | +                       | -0.23                                            | -0.78                                              | -0.33                                          | -0.64                                        | identified as a "vacular protein sorting" gene in yeast                                           | [54]      |                                                                                                                   |           |
| <i>Vps13d</i>  | vacuolar protein sorting 13 D                                       | +                       | -1.12                                            | -1.14                                              | -0.39                                          | -0.62                                        | identified as a "vacular protein sorting" gene in yeast                                           | [54]      |                                                                                                                   |           |
| <i>Msi8</i>    | MTOR associated protein, LST8 homolog                               | +                       | -0.08                                            | 0.46                                               | -0.43                                          | -0.60                                        |                                                                                                   |           | component of mTORC1                                                                                               | [63]      |
| <i>Pikfyve</i> | phosphoinositide kinase, FYVE finger containing                     | +                       | -0.04                                            | 0.26                                               | -0.06                                          | -0.58                                        | regulates endomembrane homeostasis                                                                | [55]      | necessary for maturation of autolysosomes                                                                         | [31]      |
| <i>Ruf3</i>    | RUN and FYVE domain containing 3                                    | +                       | -0.15                                            | -0.25                                              | -0.09                                          | -0.55                                        | mediates microtubule directed vesicle transport                                                   | [56]      | direct interaction with autophagic components (LC3)                                                               | [56, 64]  |
| <i>Exoc2</i>   | exocyst complex component 2                                         | +                       | -0.65                                            | -0.70                                              | -1.17                                          | -0.50                                        | essential for neuronal membrane trafficking and neurogenesis                                      | [57]      | part of the exocyst complex, exocyst components mediate autophagosome assembly                                    | [65]      |
| <i>Ambra1</i>  | autophagy/beclin 1 regulator 1                                      | +                       | -0.45                                            | -0.61                                              | -0.28                                          | -0.49                                        |                                                                                                   |           | regulates autophagy and development of nervous system                                                             | [30, 66]  |
| <i>Naec1</i>   | nucleus accumbens associated 1, BEN and BTB (POZ) domain containing | +                       | 0.02                                             | -0.10                                              | -0.19                                          | -0.49                                        |                                                                                                   |           | regulates stress-induced autophagy                                                                                | [67, 68]  |
| <i>Vps28</i>   | vacuolar protein sorting 28                                         | +                       | -0.60                                            | -0.73                                              | -0.58                                          | -0.38                                        | member of ESCRT-I, sorting of ubiquitinated proteins in multivesicular body/late endosome pathway | [58, 19]  | ESCRTs regulate autophagy, ESCRT plays role in autophagy associated neurodegeneration                             | [31, 69]  |
| <i>Klhd10</i>  | kelch domain containing 10                                          | +                       | 0.04                                             | 0.00                                               | -0.07                                          | -0.19                                        |                                                                                                   |           | direct interaction with autophagic components                                                                     | [64]      |
| <i>Tbc1d14</i> | TBC1 domain family, member 14                                       | +                       | -0.19                                            | -0.29                                              | -0.26                                          | -0.07                                        | regulates recycling endosomal trafficking                                                         | [59]      | regulates starvation-induced autophagy                                                                            | [70]      |
| <i>Pcdc5</i>   | programmed cell death 5                                             | +                       | 0.12                                             | -0.11                                              | -0.14                                          | -0.04                                        |                                                                                                   |           | activator of autophagy                                                                                            | [71]      |
| <i>Vamp4</i>   | vesicle-associated membrane protein 4                               | +                       | -0.53                                            | -0.56                                              | -0.33                                          | -0.03                                        | plays a role in trans-Golgi network-to-endosome transport                                         | [60]      | was found in phagocytotic membranes together with LC3, induction of autophagy leads to strong enrichment of Vamp4 | [72]      |
| <i>Pex14</i>   | peroxisomal biogenesis factor 14                                    | +                       | -0.17                                            | 0.12                                               | 0.08                                           | 0.00                                         | peroxisomal membrane protein                                                                      | [61]      | required for peroxisomal autophagy (pexophagy)                                                                    | [73]      |

**Supplementary Table S3: Miz1 target genes with documented roles in autophagy.**

The table summarizes microarray data, previously published data linking proteins encoded by Miz1 target genes to autophagy and relevant literature.

### Supplementary Table S4

| GO term                                              | p-value<br>sec.<br>spheres | q-value<br>sec.<br>spheres | p-value<br>quart.<br>spheres | q-value<br>quart.<br>spheres |
|------------------------------------------------------|----------------------------|----------------------------|------------------------------|------------------------------|
| cell morphogenesis<br>involved in<br>differentiation | > 0.1                      | 1                          | $1.4 \times 10^{-5}$         | 0.030                        |
| neuron projection<br>morphogenesis                   | > 0.1                      | 1                          | $1.5 \times 10^{-4}$         | 0.065                        |
| neuron differentiation                               | > 0.1                      | 1                          | $1.8 \times 10^{-4}$         | 0.055                        |
| axogenesis                                           | > 0.1                      | 1                          | $2.1 \times 10^{-4}$         | 0.057                        |

Supplementary Table S4: Microarray analysis of secondary and quaternary *Miz1*<sup>ΔPOZ</sup> and control neurospheres was performed. Genes that are downregulated more than twofold in quaternary *Miz1*<sup>ΔPOZ</sup> neurospheres were subjected to GO-term analysis. The table lists p- and q-values for individual GO-terms in secondary and quaternary spheres (<http://david.abcc.ncifcrf.gov/home.jsp>).

### Supplementary Table S5

| Rank | geneset                    | NES  | p-value | q-value |
|------|----------------------------|------|---------|---------|
| 1    | Schuhmacher Myc Targets up | 3.08 | 0.000   | 0.000   |
| 4    | Dang Myc Targets up        | 2.82 | 0.000   | 0.000   |
| 6    | Coller Myc Targets up      | 2.75 | 0.000   | 0.000   |
| 17   | Menssen Myc Targets        | 2.41 | 0.000   | 0.000   |
| 391  | Miz-bound Promotors NPC    | 0.75 | 0.969   | 1.000   |

Supplementary Table S5: Lack of regulation of Miz1-autophagic target genes by Myc.

The panel shows the results of a GSEA demonstrating using a dataset from T-cell lymphomas that express a doxycyclin-regulatable allele of Myc<sup>2</sup>. Microarrays were performed before and 24hrs after de-induction of Myc. The table documents significant regulation of known sets of Myc-target genes and the lack of significant regulation of the gene set which contains the 140 genes directly bound by Miz1 (see Figure 3c).

## Supplementary Table S6

| Supplementary Table S6  |                          |
|-------------------------|--------------------------|
| qRT-PCRs:               | sequence                 |
| <i>Miz-1</i> for        | CGTGGTGCACCTAGACATCA     |
| <i>Miz-1</i> rev        | GTTCTCAGGGCTAAGGCTCA     |
| <i>Cdkn2b</i> (p15) for | TGCAGATGATCCACAGGCTA     |
| <i>Cdkn2b</i> (p15) rev | GTGAATCCCCACACATGACA     |
| <i>Cdkn1a</i> (p21) for | TCCACAGCGATATCCAGACA     |
| <i>Cdkn1a</i> (p21) rev | GGCACACTTTGCTCCTGTG      |
| <i>Cdkn1c</i> (p57) for | CAGGACGAGAATCAAGAGCA     |
| <i>Cdkn1c</i> (p57) rev | GCTTGGCGAAGAAGTCGT       |
| <i>Cdkn2a</i> (p16) for | AACGCCCGAACTCTTTC        |
| <i>Cdkn2a</i> (p19) for | GCTCTGGCTTTCTGTAACAT     |
| <i>Cdkn2a</i> (p19) rev | GTGAACGTTGCCCATCATC      |
| <i>Myc</i> for          | TTTGTCTATTTGGGGACAGTGTT  |
| <i>Myc</i> rev          | CATCGTCGTGGCTGTCTG       |
| <i>Bmi1</i> for         | AAACCAGACCACTCCTGA       |
| <i>Bmi1</i> rev         | TCTTCTTCTCTTCATCTCA      |
| <i>Gne</i> for          | CAAACCTGAGGGTGGCAATA     |
| <i>Gne</i> rev          | GGTTTTAGGGTTGAACTGAGTG   |
| <i>Rorc</i> for         | ACCTCTTTTCACGGGAGGA      |
| <i>Rorc</i> rev         | TCCACATCTCCCACATTG       |
| <i>Exoc2</i> for        | GGGAGAACCCTGGGTACTGGT    |
| <i>Exoc2</i> rev        | CCGTGAGGAGGCAATTATGT     |
| <i>Vps72</i> for        | GGAGGCCAAGATCACTGAAG     |
| <i>Vps72</i> rev        | CAGCCTCCAGCCTTTCATAG     |
| <i>Vps28</i> for        | AGCTTCTGTGCGCCATCTCC     |
| <i>Vps28</i> rev        | CCCAGGCAGCTATACAGCAC     |
| <i>Vps13d</i> for       | CTGTGCGTTGCACTTCTCAA     |
| <i>Vps13d</i> rev       | GGCTACGATCAGGCAGAATC     |
| <i>Ambra1</i> for       | GAGCACCCAATTTACCCAGA     |
| <i>Ambra1</i> rev       | GATCATCCTCTGGGCGTAGTA    |
| <i>Nacc1</i> for        | GTGACCCCTCAGAGAAGCTG     |
| <i>Nacc1</i> rev        | TGGCAGTTCATAAGCTGTGC     |
| <i>Pikfive</i> for      | CCCCCTTCAAGTCAGCATATAG   |
| <i>Pikfive</i> rev      | GAGACTGCTGCTCTCCTTGG     |
| <i>Rufy3</i> for        | TGATGCAAAAAGAAGCTTTCTGA  |
| <i>Rufy3</i> rev        | TGAGGGCATTGACTTCATAGA    |
| <i>Pdcd5</i> for        | TCAGCCAACAGACAGAAAAGAA   |
| <i>Pdcd5</i> rev        | CGTCTTCATCGGAGTCCATT     |
| <i>Tbc1d14</i> for      | CAAAGCCGGAACAAGAAATG     |
| <i>Tbc1d14</i> rev      | GGCTTCCTTTTCTCCATCTCC    |
| <i>Klhdc10</i> for      | CCAGATGGGTACAGATGGCTA    |
| <i>Klhdc10</i> rev      | AGGTTGTTTTCCATGCAGCAC    |
| <i>Pex14</i> for        | CCAGGAAGTGAAAATGTGGTG    |
| <i>Pex14</i> rev        | GGACCCGAGAATTCTGTAGGA    |
| <i>RpS16</i> for        | AGGAGCGATTTGCTGGTGTG     |
| <i>RpS16</i> rev        | GCTACCAGGGCCTTTGAGAT     |
| <i>Actb</i> for         | CTAAGGCCAACCGTGAAAAG     |
| <i>Actb</i> rev         | ACCAGAGGCATACAGGGACA     |
| <i>Beta2m</i> for       | AGCCGAACATACTGAACTGCTACG |

|                          |                                                                    |
|--------------------------|--------------------------------------------------------------------|
| <i>Beta2m</i> rev        | CGGCCATACTGTCATGCTTAACTC                                           |
| <b>genomic PCRs:</b>     |                                                                    |
| <i>Miz-1</i> intron 2    | GTATTCTGCTGTGGGGCTATC                                              |
| <i>Miz-1</i> exon 3      | GGCTGTGCTGGGGGAAATC                                                |
| <i>Miz-1</i> intron 4    | GGCAGTTACAGGCTCAGGTG                                               |
| <i>Cre Nestin</i> for    | CCGTTTGCCGGTCGTGGG                                                 |
| <i>Cre Nestin</i> rev    | CGTATATCCTGGCAGCGATC                                               |
| <i>Vps72</i> -TSS for    | AGACGCTGAACTTCCGTCAT                                               |
| <i>Vps72</i> -TSS rev    | CAGATCGGCACTCGACACTA                                               |
| <i>Vamp4</i> -TSS for    | AGACGCTCGATCTCCGTTG                                                |
| <i>Vamp4</i> -TSS rev    | TACTCCGAGTCCTGGAGAGG                                               |
| <i>Vps28</i> -TSS for    | CGCAAGCTCAGGCAAAAA                                                 |
| <i>Vps28</i> -TSS rev    | AGCTCGGCACTCATCTCTA                                                |
| <i>Ambra1</i> -TSS for   | AGCAGGAGCTGAGCAATGTT                                               |
| <i>Ambra1</i> -TSS rev   | GCCCAGACATCAAAGGAAGA                                               |
| <i>Exoc2</i> -TSS for    | ACTCGGTGCTCGGCTAGG                                                 |
| <i>Exoc2</i> -TSS rev    | AGCACTAGGGCCGCACTT                                                 |
| <i>Rorc</i> -TSS for     | GGTTGTTGGGTAAGCAGGAA                                               |
| <i>Rorc</i> -TSS rev     | AATATTGGATGCCTCAGTTTCG                                             |
| <i>Gne</i> -TSS for      | ACTACCAGAGGCGACACGAC                                               |
| <i>Gne</i> -TSS rev      | CCCCTCCTTGGCGTATTT                                                 |
| <i>Nacc1</i> -TSS for    | AAAGAGGAGCTGGTGAGAACC                                              |
| <i>Nacc1</i> -TSS rev    | GGCAGGGAGGAAAACCTGC                                                |
| <i>Tbc1d14</i> -TSS1 for | ATGATCTGTAACCTGCGCTCAC                                             |
| <i>Tbc1d14</i> -TSS1 rev | AGCAGCTGGGGGAGTCTTA                                                |
| <i>Tbc1d14</i> -TSS2 for | GCCCAACCTAGGAACACTGA                                               |
| <i>Tbc1d14</i> -TSS2 rev | GAACGGCAGGACACTCAATC                                               |
| <i>Mcoln1</i> -TSS for   | CGCTTGTCACGTGTTTCAGTT                                              |
| <i>Mcoln1</i> -TSS rev   | CTTCAAACCCTCCC GCATC                                               |
| intergenic for           | CACAAGTGTGGAGCCTGGTA                                               |
| intergenic rev           | CCTTGAACCTTGCAGCTTCC                                               |
| <b>EMSA:</b>             |                                                                    |
| <i>Vps28</i> for         | GCTACTCCAGAGCGCAAGCTCAGGCAAAAAAGCC<br>GAGTGCCGATCAATGGATTGGCTTGCT  |
| <i>Vps28</i> rev         | AGCAAGCCAAATCCATTGATCGGCACTCGGCT<br>TTTTTTGCCTGAGCTTGCCTCTGGAGTAGC |
| <i>Ambra1</i> for        | GCTGAGCAATGTTTCGGCACTCGGCTGCAGTG<br>CCTTGAACGATTGCTGGGGCGCTCTTCCT  |
| <i>Ambra1</i> rev        | AGGAAGAGCGCCCCAGCAATCGTTCAAGGCACTGC<br>AGCCGAGTGCCGAAACATGCTCAGC   |
| <i>Rsrc1wt</i> for       | GTCCATCGATGCACTCGATATCTCGGCTGAAGCTG<br>CCTGGCGCTAGAACCAGGAAGGCGC   |
| <i>Rsrc1wt</i> rev       | GCGCCTTCTGGTTCTAGCGCCAGGCACTTCAGC<br>CGAGATATCGAGTGCATCGATGGAC     |
| <i>Rsrc1mut1</i> for     | GTCCATCGATGCACGAGATATCTCGGCTGAAGCTG<br>CCTGGCGCTAGAACCAGGAAGGCGC   |
| <i>Rsrc1mut1</i> rev     | GCGCCTTCTGGTTCTAGCGCCAGGCACTTCAGC<br>CGAGATATCTCGTGCATCGATGGAC     |
| <i>Rsrc1mut4</i> for     | GTCCATCGATGCACGAGATATCGATGAGGAAGCTG<br>CCTGGCGCTAGAACCAGGAAGGCGC   |

|                       |                                                                  |
|-----------------------|------------------------------------------------------------------|
| <i>Rsrc1</i> mut4 rev | GCGCCTTCCTGGTTCTAGCGCCAGGCAGCTTCCTC<br>ATCGATATCTCGTGCATCGATGGAC |
| <i>Rsrc1</i> mut5 for | GTCCATCGATGCACTCGATATATCGGCTGAAGCTG<br>CCTGGCGCTAGAACCAGGAAGGCGC |
| <i>Rsrc1</i> mut5 rev | GCGCCTTCCTGGTTCTAGCGCCAGGCAGCTTCAGC<br>CGATATATCGAGTGCATCGATGGAC |
| <i>Ubp2</i> for       | GGCTTGCCCTGAGTGGTTGGACCACATCACGTGAT<br>GAGCACAGGGCGGCCACAGGGGAGT |
| <i>UBAP2</i> rev      | ACTCCCCTGTGGCCGCCCTGTGCTCATCACGTGAT<br>GTGGTCCAACCACTCAGGGCAAGCC |
| <b>cloning:</b>       |                                                                  |
| <i>RORC</i> for       | CCGCTCGAGAGAGCAGGAGGAGGTGCCAG                                    |
| <i>RORC</i> rev       | GGAAGATCTGGGGCAGCTCCCTTGGTGCC                                    |
| <i>AMBRA1</i> for     | CCGCTCGAGAGTAGGAGTTGAGCTGTTTT                                    |
| <i>AMBRA1</i> rev     | GGAAGATCTCAAAGGAGGAACGCCCAAGC                                    |

Supplementary Table S6: Primer Sequences.

### Supplementary References

- 52 Lipinski, M. M. *et al.* A genome-wide siRNA screen reveals multiple mTORC1 independent signaling pathways regulating autophagy under normal nutritional conditions. *Dev Cell* **18**, 1041-1052 (2010).
- 53 Thompson, E. G., Schaheen, L., Dang, H. & Fares, H. Lysosomal trafficking functions of mucolipin-1 in murine macrophages. *BMC Cell Biol* **8**, 54 (2007).
- 54 Bankaitis, V. A., Johnson, L. M. & Emr, S. D. Isolation of yeast mutants defective in protein targeting to the vacuole. *Proc Natl Acad Sci U S A* **83**, 9075-9079 (1986).
- 55 Rutherford, A. C. *et al.* The mammalian phosphatidylinositol 3-phosphate 5-kinase (PIKfyve) regulates endosome-to-TGN retrograde transport. *J Cell Sci* **119**, 3944-3957 (2006).
- 56 Pankiv, S. *et al.* FYCO1 is a Rab7 effector that binds to LC3 and PI3P to mediate microtubule plus end-directed vesicle transport. *J Cell Biol* **188**, 253-269 (2010).
- 57 Murthy, M., Garza, D., Scheller, R. H. & Schwarz, T. L. Mutations in the exocyst component Sec5 disrupt neuronal membrane traffic, but neurotransmitter release persists. *Neuron* **37**, 433-447 (2003).
- 58 Rieder, S. E., Banta, L. M., Kohrer, K., McCaffery, J. M. & Emr, S. D. Multilamellar endosome-like compartment accumulates in the yeast vps28 vacuolar protein sorting mutant. *Mol Biol Cell* **7**, 985-999 (1996).
- 59 Longatti, A. & Tooze, S. A. Recycling endosomes contribute to autophagosome formation. *Autophagy* **8**, 1682-1683 (2012).
- 60 Mallard, F. *et al.* Early/recycling endosomes-to-TGN transport involves two SNARE complexes and a Rab6 isoform. *J Cell Biol* **156**, 653-664 (2002).
- 61 Komori, M. *et al.* The *Hansenula polymorpha* PEX14 gene encodes a novel peroxisomal membrane protein essential for peroxisome biogenesis. *Embo J* **16**, 44-53 (1997).
- 62 Malicdan, M. C. V., Noguchi, S. & Nishino, I. Autophagy in a mouse model of distal myopathy with rimmed vacuoles or hereditary inclusion body myopathy. *Autophagy* **3**, 396-398 (2007).
- 63 Sini, P., James, D., Chresta, C. & Guichard, S. Simultaneous inhibition of mTORC1 and mTORC2 by mTOR kinase inhibitor AZD8055 induces autophagy and cell death in cancer cells. *Autophagy* **6**, 553-554 (2010).



- 64 Behrends, C., Sowa, M. E., Gygi, S. P. & Harper, J. W. Network organization of the human autophagy system. *Nature* **466**, 68-76 (2010).
- 65 Bodemann, B. O. *et al.* RalB and the exocyst mediate the cellular starvation response by direct activation of autophagosome assembly. *Cell* **144**, 253-267 (2011).
- 66 Vazquez, P. *et al.* Atg5 and Ambra1 differentially modulate neurogenesis in neural stem cells. *Autophagy* **8**, 187-199 (2012).
- 67 Zhang, Y., Yang, J. W., Ren, X. & Yang, J.-M. NAC1 and HMGB1 enter a partnership for manipulating autophagy. *Autophagy* **7**, 1557-1558 (2011).
- 68 Zhang, Y. *et al.* NAC1 modulates sensitivity of ovarian cancer cells to cisplatin by altering the HMGB1-mediated autophagic response. *Oncogene* **31**, 1055-1064 (2012).
- 69 Lee, J.-A. & Gao, F.-B. Roles of ESCRT in autophagy-associated neurodegeneration. *Autophagy* **4**, 230-232 (2008).
- 70 Longatti, A. *et al.* TBC1D14 regulates autophagosome formation via Rab11- and ULK1-positive recycling endosomes. *J Cell Biol* **197**, 659-675 (2012).
- 71 An, L. *et al.* Involvement of autophagy in cardiac remodeling in transgenic mice with cardiac specific over-expression of human programmed cell death 5. *PLoS One* **7**, e30097 (2012).
- 72 Shui, W. *et al.* Membrane proteomics of phagosomes suggests a connection to autophagy. *Proc Natl Acad Sci U S A* **105**, 16952-16957 (2008).
- 73 Zutphen, T. v., Veenhuis, M. & van der Klei, I. J. Pex14 is the sole component of the peroxisomal translocon that is required for pexophagy. *Autophagy* **4**, 63-66 (2008).
